# Supplementary material
Source: PubMed Central journal article supplement (PMC6941527)
Supplement: JB.00542-19-s0001.pdf [file JB.00542-19-s0001.pdf]

# Supplemental Material

## **Molecular basis of substrate recognition of endonuclease Q from the euryarchaeon *Pyrococcus furiosus***

Miyako Shiraishi<sup>#</sup> and Shigenori Iwai

Department of Materials Engineering Science, Graduate School of Engineering Science, Osaka  
University, 1-3 Machikaneyamacho, Toyonaka, Osaka, Japan

Running title: Identifying new genome maintenance functions of EndoQ

<sup>#</sup> Address correspondence to Miyako Shiraishi (m.shiraishi@chem.es.osaka-u.ac.jp)

Table S1. Oligonucleotides used in this study.

| Name           | Length (nt) | Lesion/Modification                           | Position | Sequence (5'-3')                         | Description                          |
|----------------|-------------|-----------------------------------------------|----------|------------------------------------------|--------------------------------------|
| BsuEndoQ-F     | 39          | none                                          |          | ATTTTCAGGGCCATATGAAAACCAATCATGGGATCTGG   | For the cloning of the BsuEndoQ gene |
| BsuEndoQ-R     | 39          | none                                          |          | TGCTCGAGTCGGCGCTTACGGCTTGATTTGCCGTAC     | For the cloning of the BsuEndoQ gene |
| BsEndoQ-E90A-F | 37          | none                                          |          | TCATCAATAATCTCCAGCGCTCCCAATAAAGAG        | For the E90A mutation                |
| BsEndoQ-E90A-R | 37          | none                                          |          | CTCTTTATTTGGGAGCGGGCTGGAGATTTATGATGA     | For the E90A mutation                |
| marker (13)    | 13          | none                                          |          | CTCGTCAGCATCT                            |                                      |
| marker (14)    | 14          | none                                          |          | CTCGTCAGCATCTT                           |                                      |
| T              | 30          | none                                          |          | CTCGTCAGCATCTTCATCATACAGTCAGTG           |                                      |
| U              | 30          | uracil                                        | 14       | CTCGTCAGCATCT (U) CATCATACAGTCAGTG       |                                      |
| Hx             | 30          | hypoxanthine                                  | 14       | CTCGTCAGCATCT (Hx) CATCATACAGTCAGTG      |                                      |
| 5mC            | 30          | 5-methylcytosine                              | 14       | CTCGTCAGCATCT (5mC) CATCATACAGTCAGTG     |                                      |
| 5hmU           | 30          | 5-hydroxymethyluracil                         | 14       | CTCGTCAGCATCT (5hmU) CATCATACAGTCAGTG    |                                      |
| cis CPD        | 30          | <i>cis-sin</i> cyclobutane pyrimidine dimer   | 14,15    | CTCGTCAGCATCT (cisCPD) CATCATACAGTCAGTG  |                                      |
| trans CPD      | 30          | <i>trans-sin</i> cyclobutane pyrimidine dimer | 14,15    | CTCGTCAGCATC (transCPD) CATCATACAGTCAGTG |                                      |
| 6-4PP          | 30          | (6-4) photoproduct                            | 14,15    | CTCGTCAGCATC (6-4PP) CATCATACAGTCAGTG    |                                      |
| DewarPP        | 30          | Dewar photoproduct                            | 14,15    | CTCGTCAGCATC (DewarPP) CATCATACAGTCAGTG  |                                      |
| AP             | 30          | abasic furan (dSpacer)                        | 14       | CTCGTCAGCATCT (AP) CATCATACAGTCAGTG      |                                      |
| 5hU            | 30          | 5-hydroxyuracil                               | 14       | CTCGTCAGCATCT (5hU) CATCATACAGTCAGTG     |                                      |
| 5hC            | 30          | 5-hydroxycytosine                             | 14       | CTCGTCAGCATCT (5hC) CATCATACAGTCAGTG     |                                      |
| DHT            | 30          | 5,6-dihydrothymine                            | 14       | CTCGTCAGCATCT (DHT) CATCATACAGTCAGTG     |                                      |
| DHU            | 30          | 5,6-dihydrouracil                             | 14       | CTCGTCAGCATCT (DHU) CATCATACAGTCAGTG     |                                      |
| RTg            | 30          | (5R)-thymine glycol                           | 14       | CTCGTCAGCATCT (RTg) CATCATACAGTCAGTG     |                                      |
| STg            | 30          | (5S)-thymine glycol                           | 14       | CTCGTCAGCATCT (STg) CATCATACAGTCAGTG     |                                      |
| G:A            | 30          | none                                          | 14       | CTCGTCAGCATCTGCATCATACAGTCAGTG           | G:A mismatch                         |
| C:A            | 30          | none                                          | 14       | CTCGTCAGCATCTCCATCATACAGTCAGTG           | C:A mismatch                         |
| 6mA            | 30          | N <sup>6</sup> -methyladenine                 | 14       | CTCGTCAGCATCT (6mA) CATCATACAGTCAGTG     |                                      |
| 6mG            | 30          | O <sup>6</sup> -methylguanine                 | 14       | CTCGTCAGCATCT (6mG) CATCATACAGTCAGTG     |                                      |
| 8oxoG          | 30          | 8-oxoguanine                                  | 14       | CTCGTCAGCATCT (8oxoG) CATCATACAGTCAGTG   |                                      |
| rU             | 30          | uridine                                       | 14       | CTCGTCAGCATCT (rU) CATCATACAGTCAGTG      |                                      |
| rA             | 30          | adenosine                                     | 14       | CTCGTCAGCATCT (rA) CATCATACAGTCAGTG      |                                      |
| RNA            | 30          | none                                          |          | CUCGUCAGCAUUCUACAUCAGUCAGUG              | RNA                                  |
| dC-RNA         | 30          | deoxycytosine                                 | 12       | CUCGUCAGCAU (dC) UUCAUCAUCAGUCAGUG       | RNA                                  |
| comp(A)        | 30          | none                                          |          | CACTGACTGTATGATGAGATGCTGACGAG            | complement DNA                       |
| comp(T)        | 30          | none                                          |          | CACTGACTGTATGATGAGATGCTGACGAG            | complement DNA                       |
| comp(G)        | 30          | none                                          |          | CACTGACTGTATGATGAGATGCTGACGAG            | complement DNA                       |
| comp(C)        | 30          | none                                          |          | CACTGACTGTATGATGAGATGCTGACGAG            | complement DNA                       |

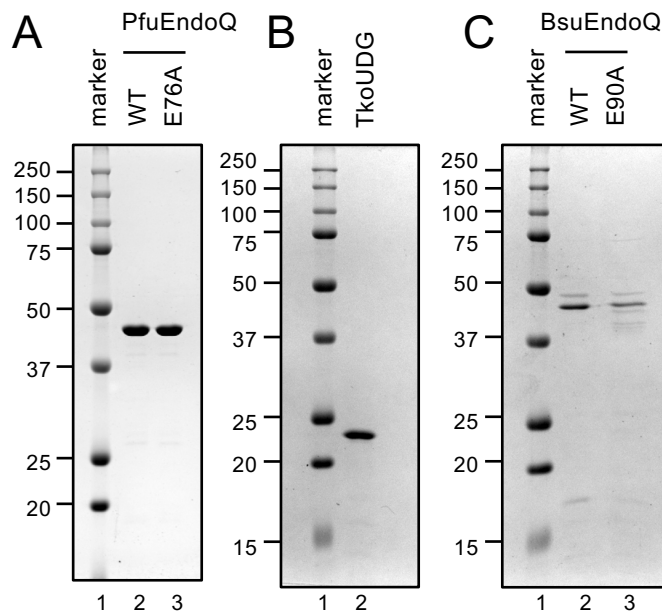

**Figure S1. Purified recombinant proteins.** Each protein was visualized by 12.5% SDS-PAGE, followed by Coomassie Brilliant Blue staining. Molecular weight (MW) standards are indicated on the left of the panels (lane 1, Bio-Rad, #1610374). (A) Lane 2, PfuEndoQ<sup>WT</sup> (MW: 47639.03; 1  $\mu$ g); lane 3, PfuEndoQ<sup>E76A</sup> (MW: 47580.99; 1  $\mu$ g). (B) Lane 2, TkoUDG (MW: 22463.3; 1  $\mu$ g). (C) Lane 2, BsuEndoQ<sup>WT</sup> (MW: 44863.37; 0.5  $\mu$ g); lane 3 BsuEndoQ<sup>E90A</sup> (MW: 44808.33; 0.5  $\mu$ g). Purification of TkoUDG: the expression vectors encoding TkoUDG (BAD86332) (pET21a-TkoUDG) was gifted by Dr. Y. Ishino (Kyushu University, Fukuoka, Japan). TkoUDG was overproduced in *E. coli* BL21 CodonPlus (DE3)-RIL (Agilent Technologies) cells containing pET21a-TkoUDG. The cells were grown with shaking in 1 L of Luria-Bertani (LB) medium, containing 50  $\mu$ g/mL ampicillin and 34  $\mu$ g/mL chloramphenicol (Cm) at 37°C until the optical density (OD) at 600 nm was 0.5. To produce proteins, the inducer isopropyl  $\beta$ -D-thiogalactopyranoside (IPTG, 0.1 mM) was added to the culture and the cells were further grown overnight at 18°C. The cells were collected by centrifugation and sonicated in buffer A (50 mM Tris-HCl, pH 8.0, 0.5 mM DTT, and 10% glycerol) containing 0.1 M NaCl and 1 mM phenylmethylsulfonyl fluoride (PMSF). The soluble fraction was obtained by centrifugation and subjected to a 1 mL HiTrap Heparin HP column (GE Healthcare) and eluted with a linear gradient of 50–1000 mM NaCl in buffer A. Fractions containing TkoUDG as observed on a 15% SDS-PAGE gel, were pooled and diluted 10-fold with buffer A, and subjected to a 1 mL HiTrap SP HP column (GE Healthcare). The column was developed with a linear gradient of 50–1000 mM NaCl in buffer A. The eluted protein fractions were stored at –20°C with 50% glycerol. The protein purities were evaluated with 12.5% SDS-PAGE, followed by Coomassie brilliant blue (CBB) staining. TkoUDG (17670 M<sup>-1</sup> cm<sup>-1</sup>) were estimated as described in the main text.

**Figure S1. Purified recombinant proteins (Continued).** Cloning and purification of recombinant BsuEndoQ: The gene for BsuEndoQ (KIX84288, YqxK) was amplified directly by PCR from the *B. subtilis* genomic DNA using gene-specific primers (Table S1). The amplified gene was cloned into the expression vector pET28TEV, which is a modified plasmid of pET28a (Novagen) from a thrombin recognition site to the tobacco etch virus (TEV) protease recognition site, using the In-Fusion HD Cloning Kit (Clontech). The resulting plasmids were designated as pET-BsuEndoQ<sup>WT</sup>. The E90A mutation in BsuEndoQ was generated using the primers (Table S1). The resulting plasmid was designated as pET-BsuEndoQ<sup>E90A</sup>. The nucleotide sequences of the inserted regions of all plasmids were confirmed by sequencing. For the protein purification, BsuEndoQ was overproduced in *E. coli* BL21 CodonPlus (DE3)-RIL (Agilent Technologies) cells carrying pET28-BsuEndoQ<sup>WT</sup> or BsuEndoQ<sup>E90A</sup>. The cells were grown with shaking in 2 L of LB medium containing 20 µg/ml kanamycin and 34 µg/mL Cm at 37°C (OD<sub>600</sub> = 0.3). Then, IPTG (0.1 mM) was added to the culture and the cells were further grown overnight at 18°C. The collected cells were sonicated in buffer B (50 mM Tris-HCl, pH 8.0, 0.5 M NaCl) containing 30 mM imidazole and 1 mM PMSF. The soluble fraction was obtained by centrifugation and loaded onto a 1 mL HisTrap HP column (GE Healthcare) and eluted with a linear gradient of 40–300 mM imidazole in buffer B. Fractions containing BsuEndoQ as observed on a 12.5% SDS-PAGE gel, were pooled and diluted 5-folds with buffer B, and subjected to a 1 mL HisTrap HP column (GE Healthcare) again by a step elution with 300 mM imidazole. The pooled fractions containing BsuEndoQ were further subjected to a 1 mL HiTrap Heparin HP column (GE Healthcare). The protein was eluted by a step elution with 500 mM NaCl in buffer (50 mM Tris-HCl, pH 8.0, 0.5 mM DTT, 10% glycerol). The eluted protein fractions were stored at 4°C. Protein purity was evaluated with 12.5% SDS-PAGE, followed by CBB staining. The protein concentrations were determined by measuring the absorbance at 280 nm. The theoretical molar extinction coefficient of BsuEndoQ (28225 M<sup>-1</sup> cm<sup>-1</sup>) was estimated as described in the main text.





Cleavage activity: OFF

Cleavage activity: **ON**

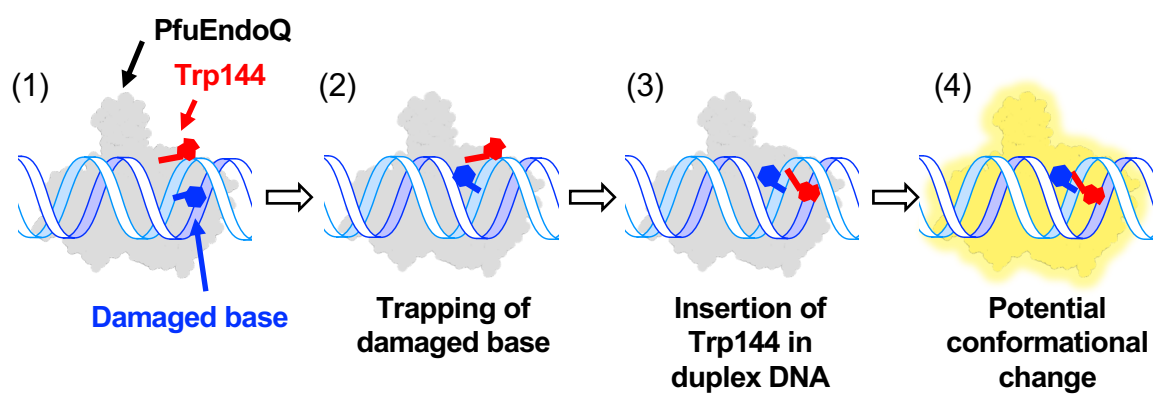

**Figure S4. A model for cleavage activity by EndoQ.** EndoQ has a relatively weak affinity to DNA (1), and may be used for searching for damaged bases in the genome (step 1). Once EndoQ finds a damaged base, the base is trapped (step 2) and a amino acid residue is inserted into the DNA duplex (step 3). This results in a conformational change in EndoQ (tight EndoQ-DNA binding), and leads to a cleavage activity (step 4). The structural image of PfuEndoQ was obtained from the protein data bank (5ZB8) (2).

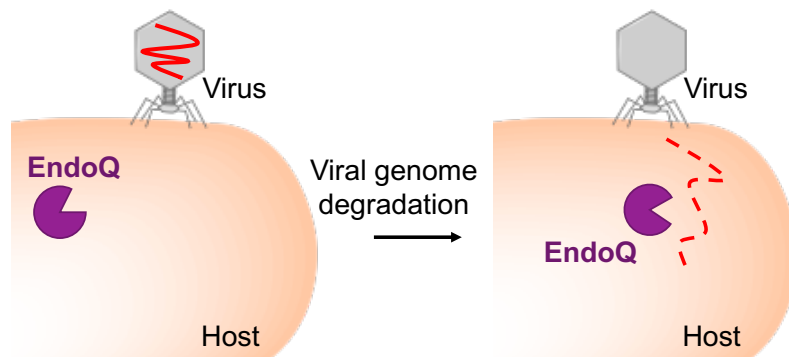

**Figure S5. Possible role of EndoQ in restriction-modification systems.** Modified viral genome (such as uracil and its derivatives) could be restricted by EndoQ.



## References

1. Shiraishi M, Ishino S, Yamagami T, Egashira Y, Kiyonari S, Ishino Y. 2015. A novel endonuclease that may be responsible for damaged DNA base repair in *Pyrococcus furiosus*. *Nucleic Acids Res* 43:2853–2863.
2. Miyazono K, Ishino S, Makita N, Ito T, Ishino Y, Tanokura M. 2018. Crystal structure of the novel lesion-specific endonuclease PfuEndoQ from *Pyrococcus furiosus*. *Nucleic Acids Res* 46:4807–4818.
